# Supplementary material for: Biodegradable Polyphosphazene Based Peptide-Polymer Hybrids
Source: PubMed Central journal article supplement (PMC6432119; doi:10.3390/polym8040161), 2016-04-22

# Supplementary Materials: Biodegradable Polyphosphazene Based Peptide-Polymer Hybrids

Anne Linhardt, Michael König, Wolfgang Schöfberger, Oliver Brüggemann, Alexander K. Andrianov and Ian Teasdale

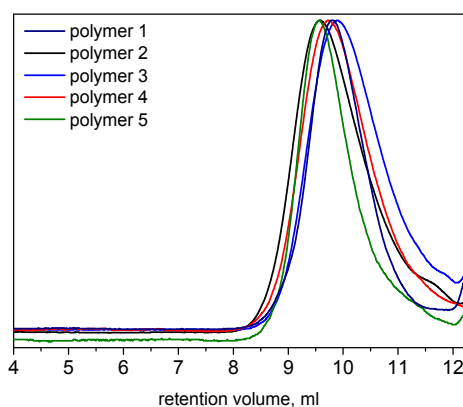

**Figure S1.** GPC chromatographs of polymer 1–5. All polymers elute at similar retention volumes indicating similar molecular weights.

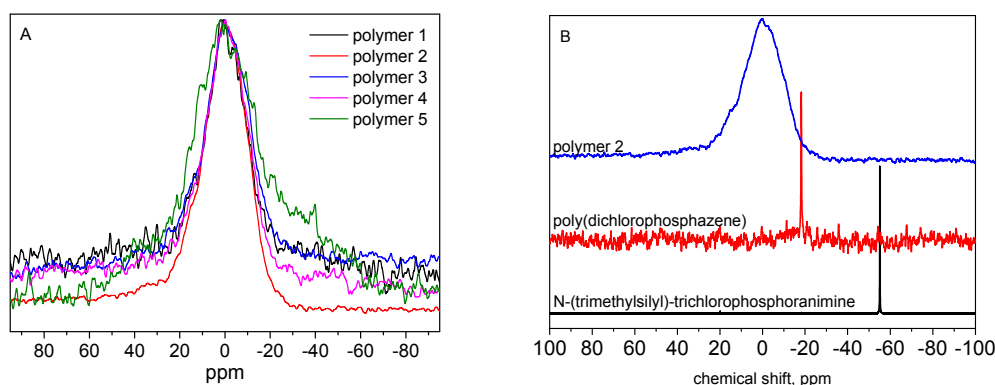

**Figure S2.** (A)  $^{31}\text{P}$  NMR spectrum of polymer 1–5. A broad peak at about 0 ppm indicates complete substitution of the chlorine atoms at polyphosphazene backbone and the absence of degradation products. (B)  $^{31}\text{P}$  NMR spectrum of the monomer (*N*-(trimethylsilyl)-trichlorophosphoranimine), the precursor polymer (poly(dichlorophosphazene) and polymer 2 to show complete monomer conversion and macromolecular substitution of the chlorine atoms at the polyphosphazene backbone.

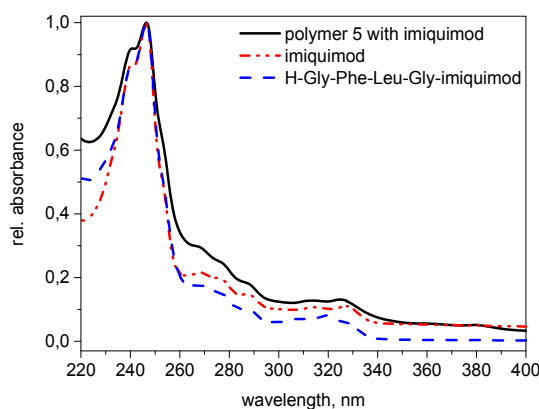

**Figure S3.** UV–Vis spectra in acetonitrile of polymer 5 loaded with 2.4 wt % imiquimod (black), of imiquimod (red) and of Gly-Phe-Leu-Gly-imiquimod (blue).

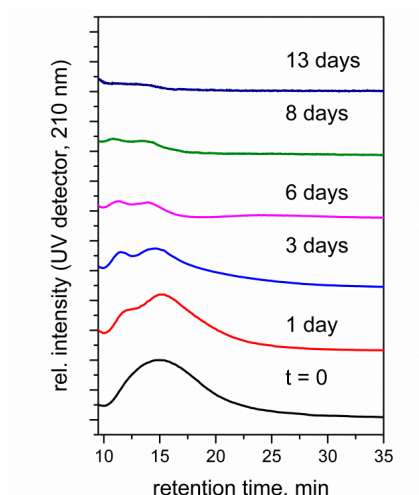

**Figure S4.** Normalized FFF analysis illustrating the degradation of polymer 2 at 37 °C in an aqueous solution at pH 2. Broadening and decrease in intensity and a shift to earlier retention time of the polymer peak are observed.

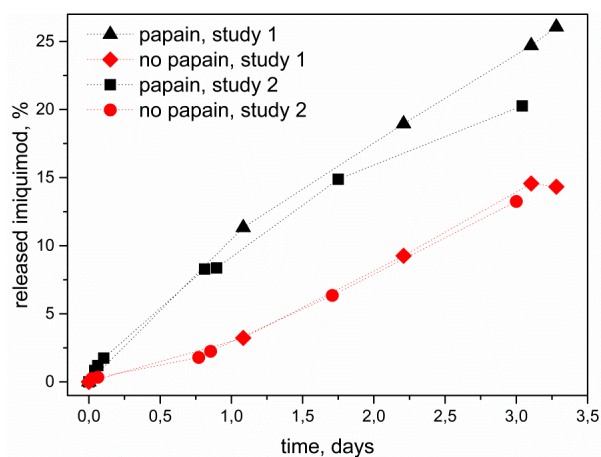

**Figure S5.** Hydrolytic and enzymatic release of imiquimod from polymer 5 during 3.5 days shown in two different studies to confirm reproducibility.

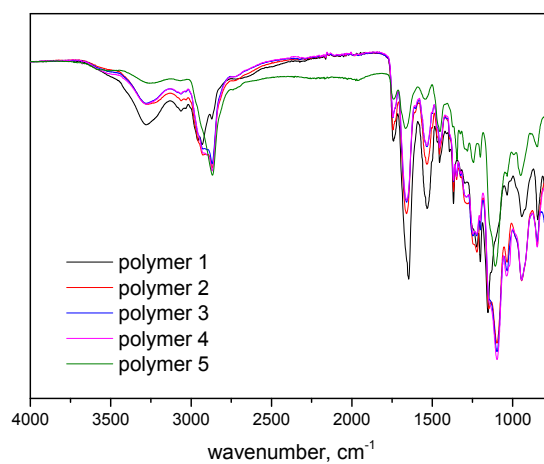

**Figure S6.** ATR-FTIR spectra of polymer 1–5.

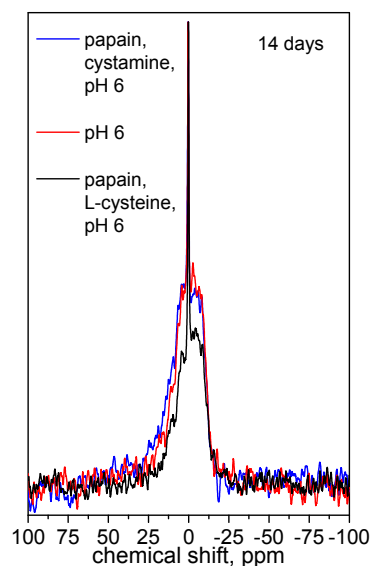

**Figure S7.** Enzymatic degradation of polymer 2 followed by  $^{31}\text{P}$  NMR spectroscopy after 14 days in citrate buffer (pH 6) containing L-cysteine and papain (black), hydrolytic degradation of polymer 2 in the same buffer system without papain (red), with papain and cystamine as inhibitor (blue). All samples were stored at 37 °C.

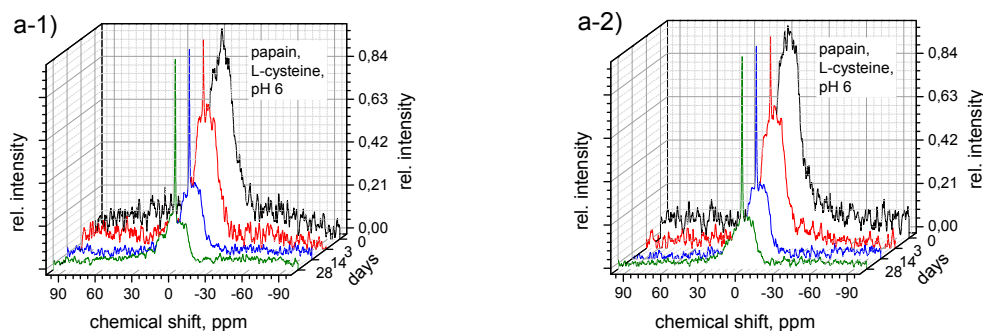

**Figure S8.** Enzymatic degradation of polymer 2 followed by  $^{31}\text{P}$  NMR spectroscopy of two different samples a-1 and a-2 under the same conditions (28 days in citrate buffer (pH 6) containing L-cysteine and papain). All samples were stored at 37 °C.

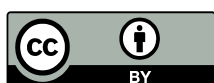

Supplement: polymers-08-00161-s001.pdf [file polymers-08-00161-s001.pdf]
